# Supplementary material
Source: PubMed Central journal article supplement (PMC3122304)
Supplement: supp_74.4.280_Lindenberg_74-280.pdf [file supp_74.4.280_Lindenberg_74-280.pdf]

## 피질척수 운동신경섬유의 구조적 완전성은 만성 뇌졸중 환자에서의 운동장애를 예견한다

### Structural integrity of corticospinal motor fibers predicts motor impairment in chronic stroke

R. Lindenberg, MD  
V. Renga, MD  
L.L. Zhu  
F. Betzler  
D. Alsop, PhD  
G. Schlaug, MD, PhD

**목적** : 뇌졸중 후의 운동장애는 뇌경색의 크기, 위치, 운동로의 완전성(motor tract integrity)과 연관이 있다고 알려져 있다. 운동기능에 대한 예측인자로써 확산텐서영상(diffusion tensor imaging, DTI)의 값을 측정하고, 만성 뇌졸중 환자에서 운동장애의 구조적 지표(structural surrogate marker)로서의 사용 가능성을 확인하기 위하여 DTI에서 얻은 운동로의 완전성 측정값과 운동장애의 연관성을 검사하였다.

**방법** : 다양한 회복 정도를 보인 35명의 만성 뇌졸중 환자를 대상으로 DTI와 운동장애 평가를 시행하였다. 중심 앞이랑(precentral gyrus)에서 기원하는 신경섬유를 추적하여 피라미드(pyramidal tract, PT)와 교대 운동신경섬유(alternate motor fibers, aMF)로 분리하였다. 병변이 있는 반구와 없는 반구에서 각각 신경섬유 수와 분할 비등방도(fractional anisotropy, FA)의 값을 측정하여 비대칭도(asymmetry indices)를 구하여 비교하였으며, 이는 운동장애 점수와 상관관계가 있었다. 또 이 값을 나이를 맞춘 대조군과도 비교하였다.

**결과** : 신경섬유 수와 FA 값의 비대칭도는 병변이 있는 반구에서 측정된 값이 더 낮아서, 대조군과 비교하였을 때 뚜렷한 차이를 보였다. 두 측정값 모두 운동장애를 예견하지만, PT만을 이용하여 측정된 값보다 모든 운동로를 포함하여 측정된 값이 훨씬 더 강력한 예측인자로 나타났다. 운동로 손상의 패턴(PT만 vs. PT와 aMF 모두)에 근거하여 그룹 간 운동장애 점수의 현저한 차이를 경도, 중등도, 중증 장애로 분류할 수 있었다.

**결론** : 확산텐서영상을 통하여 얻은 수치들은 운동장애의 타당한 구조적 지표이다. 피라미드로를 포함하는 모든 하행성 운동로의 완전성은 뇌졸중 증상의 회복을 설명한다. 운동로 손상 패턴에 근거한 3단계의 장애 분류는 운동장애 회복의 가능성 예견에 도움을 줄 것이다.

Neurology® 2010;74:280-287

Figure 2 Three impairment groups

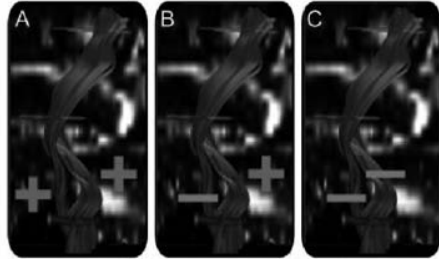

|                                  |        | Group 1<br>n = 14 | Group 2<br>n = 8 | Group 3<br>n = 13 |
|----------------------------------|--------|-------------------|------------------|-------------------|
| Fiber number<br>asymmetry scores | PT     | 0.4 ± 0.3         | 1.0 ± 0.0        | 1.0 ± 0.0         |
|                                  | PT+aMF | 0.3 ± 0.2         | 0.7 ± 0.2        | 1.0 ± 0.0         |
| Motor impairment                 | UE-FM  | 50.0 ± 10.6       | 33.6 ± 12.0      | 15.9 ± 8.8        |
|                                  | WMFT   | 0.5 ± 0.2         | 0.9 ± 0.4        | 1.5 ± 0.4         |

An asymmetry score of 1.0 indicates that no fibers could be traced in the ipsilesional hemisphere. Hence, in group 1 (A) fibers originating from the precentral gyrus were traceable both in the anterior pons (pyramidal tract [PT]) and in the posterior pons (alternate motor fibers [aMF]); in group 2 (B) only fibers passing through the posterior pons could be traced (aMF), but no fibers in the anterior pons (PT); in group 3 (C) no fibers passing through either the anterior or posterior part of the ipsilesional pons (PT or aMF) were traceable. Significant between-group differences were found in motor impairment scores for all groups (Bonferroni-corrected post hoc tests). All values are given as mean scores ± SD; Wolf Motor Function Test (WMFT) scores are given in sec/log. UE-FM = Upper Extremity Fugl-Meyer assessment.

Figure 3 Regressing fiber number asymmetry with motor impairment scores

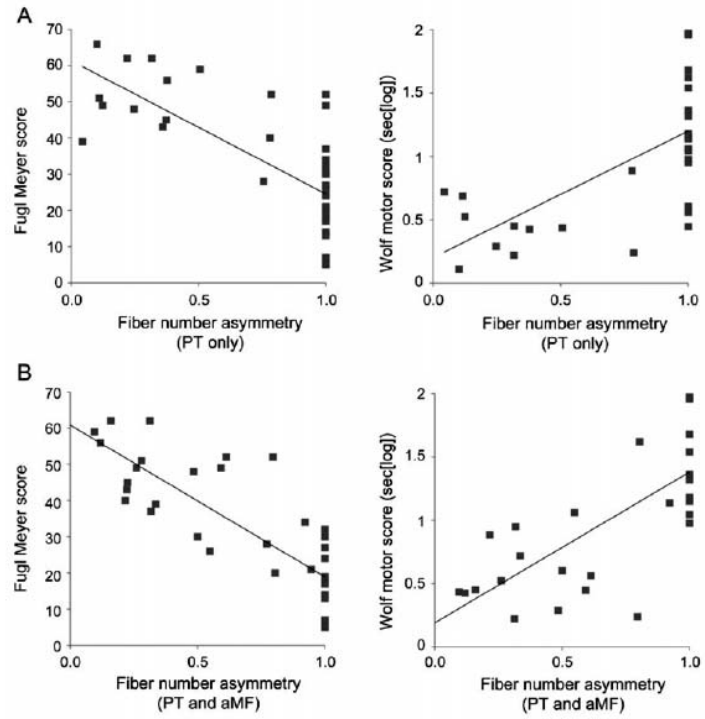

(A) Top row: Fiber number asymmetry scores using the narrow pontine region of interest (ROI) (including only pyramidal tract [PT] fibers), and (B) bottom row: using the broad pontine ROI (including PT fibers and alternate motor fibers [aMF]).

Figure 4 Regressing regional fractional anisotropy (FA) value asymmetry of the posterior limb of the internal capsule with motor impairment scores

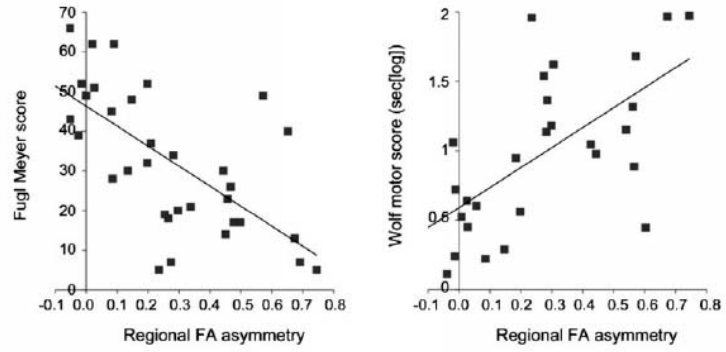

Hemispheric asymmetry of mean FA values in the internal capsule region of interest (also used for tractography of pyramidal tract fibers and alternate motor fibers).
